# Supplementary material for: Atomic bridging modulation of Ir–N, S co-doped MXene for accelerating hydrogen evolution
Source: Royal Society of Chemistry journal article supplement (doi:10.1039/d2ta00550f), 2022-01-01
Supplement: d2ta00550f1.pdf [file d2ta00550f1.pdf]

## Supporting Information

# Atomic Bridging Modulation of Ir–N, S co-doped MXene for Accelerating Hydrogen evolution

Wujun Lin<sup>a#</sup>, Ying-Rui Lu<sup>b#</sup>, Wei Peng<sup>a</sup>, Min Luo<sup>c\*</sup>, Ting-Shan Chan<sup>b\*</sup>, Yongwen Tan<sup>a\*</sup>

<sup>a</sup>College of Materials Science and Engineering, State Key Laboratory of Advanced Design and Manufacturing for Vehicle Body, Hunan University, Changsha, Hunan 410082, China.

<sup>b</sup>National Synchrotron Radiation Research Center, Hsinchu 300, Taiwan.

<sup>c</sup>Shanghai Technical Institute of Electronics & Information, Shanghai 201411, China.

<sup>#</sup>These authors contributed equally to this work.

\* Corresponding author.

E-mail: luomin@sspu.edu.cn (Min Luo), chan.ts@nsrrc.org.tw (Ting-Shan Chan), tanyw@hnu.edu.cn (Yongwen Tan)

## **Experimental section**

### **Synthesis of Catalysts**

#### **Preparation of H<sup>+</sup> melamine**

2 g melamine was dissolved in 30 mL ethanol under magnetic stirring for 15 minutes. Then, 3 mL of 12 mol L<sup>-1</sup> hydrochloric acid was slowly added into the mixed solution followed by stirring for 30 minutes. After washing with ethanol and deionized water for several times and centrifugation, H<sup>+</sup> melamine was obtained by dried at 60 °C in a vacuum oven for 10 h.

#### **Synthesis of Ti<sub>3</sub>C<sub>2</sub> MXene**

Ti<sub>3</sub>C<sub>2</sub>T<sub>x</sub> MXene was synthesized by selective etching of Al layers from Ti<sub>3</sub>AlC<sub>2</sub> MAX phase. Typically, 1 g of LiF was dissolved in a mixed solution of 5 mL deionized water and 15 mL HCl with magnetic stirring in a plastic beaker which was put it into ice-bath. After stirring for 15 minutes, 1 g of Ti<sub>3</sub>AlC<sub>2</sub> powders were slowly added into the mixed solution at the temperature of 35 °C. The beaker was then transferred into oil-bath with a constant temperature of 35 °C. After magnetic stirring for 24h, the mixture was transferred into centrifuge tube and washed with deionized water for several times (3500 rpm, 5 minutes) until the pH value reached 6. Subsequently, the supernatant was decanted to collect the sediment which contained the multilayered Ti<sub>3</sub>C<sub>2</sub>T<sub>x</sub>. The delaminated Ti<sub>3</sub>C<sub>2</sub>T<sub>x</sub> flakes were prepared by ultrasonically dispersing the re-dispersed sediment solution for 45 minutes in ice-bath. Meanwhile, argon gas was introduced to prevent oxidation. Finally, the solution was centrifuged at 3500 rpm for 1 h, then collecting the dark supernatant consisting of the

delaminated 2D MXene flakes.

### **Synthesis of Ir<sub>SA</sub>-NS-Ti<sub>3</sub>C<sub>2</sub>T<sub>x</sub>**

3 mL of above collected MXene flakes supernatant (10 mg L<sup>-1</sup>) and 30 mg of H<sup>+</sup> melamine was dissolved in 10 mL of deionized water. Meanwhile, 60 mg of thiourea was dissolved in 10 ml of deionized water. To synthesize the Ir-2NS-Ti<sub>3</sub>C<sub>2</sub>T<sub>x</sub>, the Ti<sub>3</sub>C<sub>2</sub>T<sub>x</sub> supernatant was added into a centrifuge tube. Subsequently, the H<sup>+</sup> melamine solution, H<sub>2</sub>IrCl<sub>6</sub> solution, and thiourea solution were quickly added into the Ti<sub>3</sub>C<sub>2</sub>T<sub>x</sub> supernatant and freeze-dried for 72 h. The obtained freeze-dried foam was transferred into the middle of tube furnace and heat at 550 °C for 2 h under Argon atmosphere (heating rate: 5 °C min<sup>-1</sup>). Finally, the resultant black powder was collected and named as Ir<sub>SA</sub>-2NS-Ti<sub>3</sub>C<sub>2</sub>T<sub>x</sub>. For comparison, Ir<sub>SA</sub>-1NS-Ti<sub>3</sub>C<sub>2</sub>T<sub>x</sub>, Ir<sub>SA</sub>-3NS-Ti<sub>3</sub>C<sub>2</sub>T<sub>x</sub>, and Ir-N-Ti<sub>3</sub>C<sub>2</sub>T<sub>x</sub> samples were prepared by the same procedure except changing the amount of thiourea; 1, 2 and 3 represents the mass ratio of precursor thiourea and Ti<sub>3</sub>C<sub>2</sub>T<sub>x</sub> MXene is 1:1, 1:2 and 1:3, respectively.

### **Material characterizations**

X-ray diffraction data were obtained through a Bruker D8 Advance X-ray diffractometer with Cu K $\alpha$  radiation ( $\gamma = 1.5418$  Å). Scanning electron microscopy (Zeiss Sigma HD equipped with an Oxford EDS) and Transmission electron microscopy (JEM-ARM 200F) were performed to characterize the morphology and element distribution map of catalysts. X-ray photoelectron spectroscopy spectra were obtained by Thermo Scientific ESCALAB250Xi spectrometer with Al K $\alpha$  monochromatic. The loading of Ir in Ir<sub>SA</sub>-2NS-Ti<sub>3</sub>C<sub>2</sub>T<sub>x</sub> was recorded by Inductively

coupled plasma optical emission spectrometry on Agilent 730. The Ir L<sub>3</sub>-edge and S K-edge X-ray absorption spectra were obtained at the beamline 01C1 of National Synchrotron Radiation Research Center (NSRRC, Taiwan) in the fluorescence mode.

### DFT calculations

The DFT calculations were conducted using the Vienna ab initio simulation package with the projected projector augmented wave method. The monolayer Ti<sub>3</sub>C<sub>2</sub>T<sub>x</sub> was simulated with the supercell model. The main termination of Ti<sub>3</sub>C<sub>2</sub>T<sub>x</sub> is O, as suggested by the XPS results. Therefore, a (4×4×1) Ti<sub>3</sub>C<sub>2</sub>O<sub>2</sub> cell was employed in DFT calculation. The atomic model of the Ti<sub>3</sub>C<sub>2</sub>O<sub>2</sub> monolayer was shown in **Fig S18**. At the same time, the XPS and XAFS results of Ir<sub>SA</sub>-2NS-Ti<sub>3</sub>C<sub>2</sub>T<sub>x</sub> shows the formation of Ti-N, Ir-N, S-C, Ir-S, and S-Ti bonds after Ir, N, and S doping, which suggests that some O and C atoms of Ti<sub>3</sub>C<sub>2</sub>O<sub>2</sub> monolayer were replaced by N and S atoms (**Fig S19**). A vacuum region of 18 Å was used for all calculation to eliminate the neighboring cells interactions. All the atoms were optimized until the residual forces were less than 0.01 eV Å<sup>-1</sup>.

The Gibbs free energy of the adsorbed state ( $\Delta G_H$ ) was obtained as follows:

$$\Delta G_H = \Delta E_{H^*} + \Delta E_{ZPE} - T\Delta S \quad (S1)$$

Where  $\Delta E_{H^*}$  is the hydrogen binding energy,  $\Delta E_{ZPE}$  is the zero-point energy difference, and  $\Delta S$  is the entropy change of hydrogen adsorption.

### Electrochemical characterizations

Electrochemical HER measurements were performed on an electrochemical workstation (CHI 760E) under ambient conditions. To prepare catalysts' ink, typically,

2 mg of as-prepared catalysts and 10  $\mu\text{L}$  Nafion solution (Alfa Aesar, 5wt%) were dispersed in 490  $\mu\text{L}$  ethanol by sonication for 30min. Geometric area of carbon paper is 0.25  $\text{cm}^2$ . Then, 20  $\mu\text{L}$  of catalysts' ink were dropped on the carbon paper and dried in the air. A graphite rod was used as the counter electrode, an Ag/AgCl electrode as the reference electrode, and the catalyst coated carbon paper as the working electrode. Linear sweep voltammetry was performed in Ar saturated 0.5 M  $\text{H}_2\text{SO}_4$  and 1.0 M KOH solution at a scan rate of 1  $\text{mV s}^{-1}$ . All data were  $IR$  corrected. All potentials were converted to the reversible hydrogen electrode (RHE) according to following equations:  $[E_{(RHE)} = E_{(Ag/AgCl)} + 0.059 \text{ pH} + 0.197 \text{ V}]$ . Chronoamperometric characterization data was collected at a potential of 58 mV versus RHE for 38 h.

## Note:

### Calculation of TOFs for HER

#### Acidic HER:

$$n = \frac{2 \times 10^{-3} \times 2.5\% \times \frac{20}{500}}{192.22} = 1.04 \times 10^{-8} \text{ mol}$$

$\text{Ir}_{\text{SA}}\text{-1NS-Ti}_3\text{C}_2\text{T}_x$ :

$$TOF(@0.06V) = \frac{I}{2F \times n} = \frac{0.00073}{2 \times 96500 \times 1.04 \times 10^{-8}} = 0.36 \text{ s}^{-1}$$

$$TOF(@0.08V) = \frac{I}{2F \times n} = \frac{0.00116}{2 \times 96500 \times 1.04 \times 10^{-8}} = 0.58 \text{ s}^{-1}$$

$$TOF(@0.10V) = \frac{I}{2F \times n} = \frac{0.00204}{2 \times 96500 \times 1.04 \times 10^{-8}} = 1.02 \text{ s}^{-1}$$

$\text{Ir}_{\text{SA}}\text{-2NS-~~np~~Ti}_3\text{C}_2\text{T}_x$ :

$$TOF(@0.06V) = \frac{I}{2F \times n} = \frac{0.00291}{2 \times 96500 \times 1.04 \times 10^{-8}} = 1.45 \text{ s}^{-1}$$

$$TOF(@0.08V) = \frac{I}{2F \times n} = \frac{0.014}{2 \times 96500 \times 1.04 \times 10^{-8}} = 6.97 \text{ s}^{-1}$$

$$TOF(@0.10V) = \frac{I}{2F \times n} = \frac{0.03142}{2 \times 96500 \times 1.04 \times 10^{-8}} = 15.65 \text{ s}^{-1}$$

Ir<sub>SA</sub>-3NS-~~np~~Ti<sub>3</sub>C<sub>2</sub>T<sub>x</sub>:

$$TOF(@0.06V) = \frac{I}{2F \times n} = \frac{0.00099}{2 \times 96500 \times 1.04 \times 10^{-8}} = 0.49 \text{ s}^{-1}$$

$$TOF(@0.08V) = \frac{I}{2F \times n} = \frac{0.00172}{2 \times 96500 \times 1.04 \times 10^{-8}} = 0.86 \text{ s}^{-1}$$

$$TOF(@0.10V) = \frac{I}{2F \times n} = \frac{0.00425}{2 \times 96500 \times 1.04 \times 10^{-8}} = 2.12 \text{ s}^{-1}$$

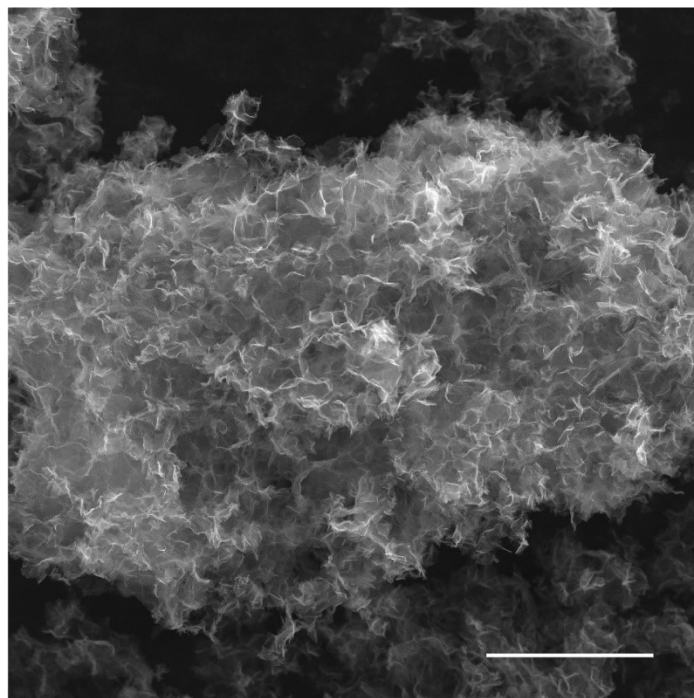

**Figure S1.** A typical SEM image of the as-prepared 2NS-Ti<sub>3</sub>C<sub>2</sub>T<sub>x</sub>. Scale bar: 10  $\mu$ m.

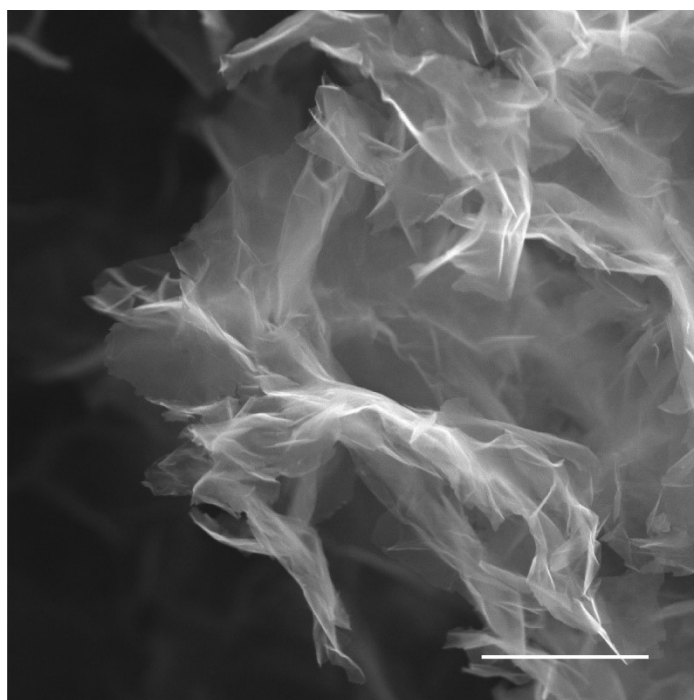

**Figure S2.** High magnification SEM image of the as-prepared Ir<sub>SA</sub>-2NS-Ti<sub>3</sub>C<sub>2</sub>T<sub>x</sub>.  
Scale bar: 1  $\mu$ m.

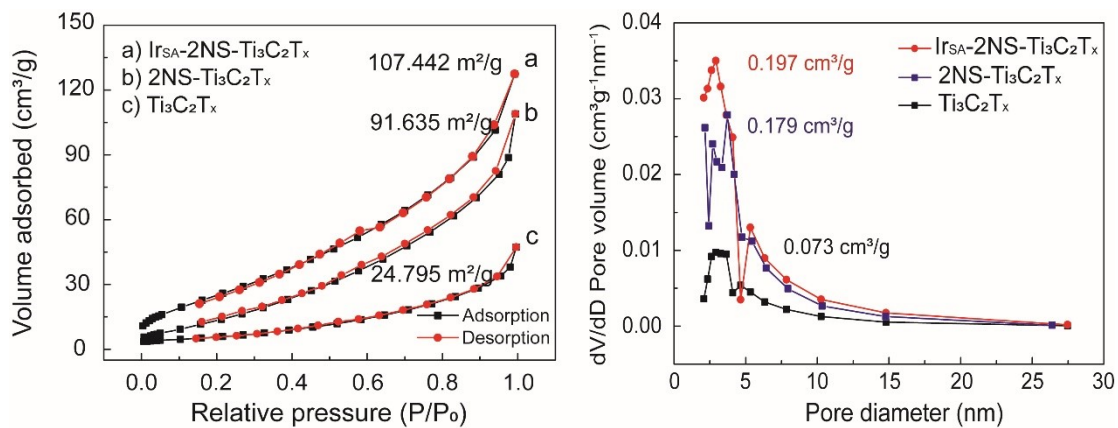

**Figure S3.** (a) BET curves of the Ti<sub>3</sub>C<sub>2</sub>T<sub>x</sub>, 2NS-Ti<sub>3</sub>C<sub>2</sub>T<sub>x</sub> and Ir<sub>SA</sub>-2NS-Ti<sub>3</sub>C<sub>2</sub>T<sub>x</sub>. (b)

The pore-size distribution of the Ti<sub>3</sub>C<sub>2</sub>T<sub>x</sub>, 2NS-Ti<sub>3</sub>C<sub>2</sub>T<sub>x</sub> and Ir<sub>SA</sub>-2NS-Ti<sub>3</sub>C<sub>2</sub>T<sub>x</sub>.

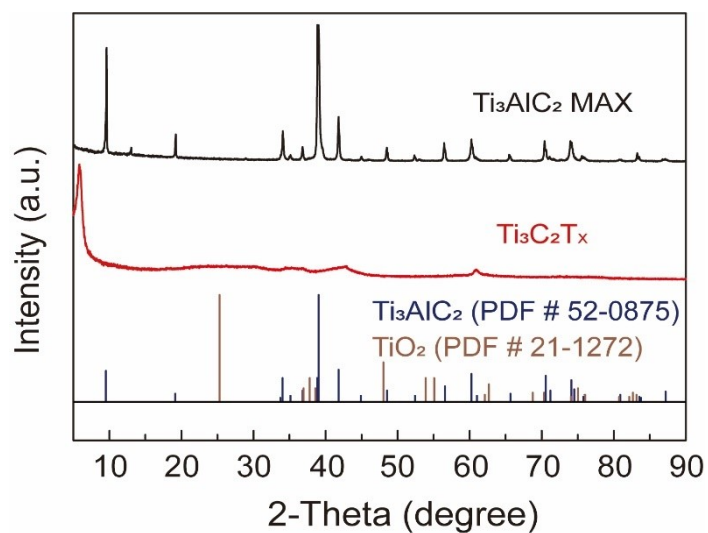

**Figure S4.** X-ray diffraction patterns of Ti<sub>3</sub>AlC<sub>2</sub> MAX and Ti<sub>3</sub>C<sub>2</sub>T<sub>x</sub> MXene.



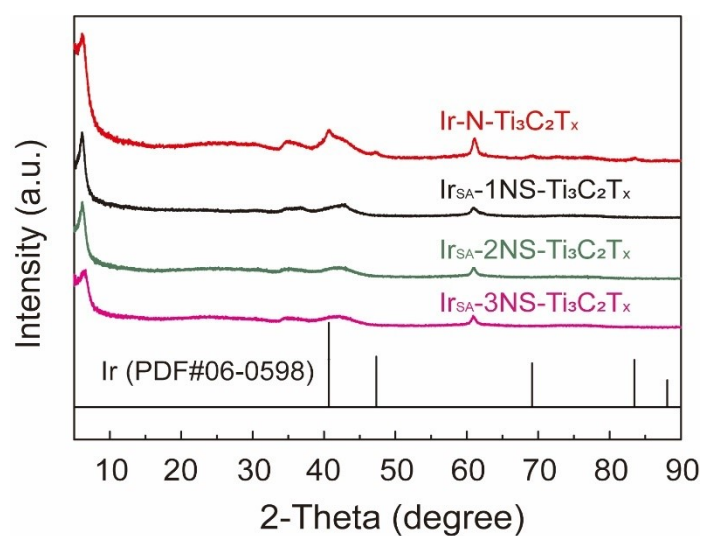

**Figure S5.** X-ray diffraction patterns of Ir-N-Ti<sub>3</sub>C<sub>2</sub>T<sub>x</sub>, Ir<sub>SA</sub>-1NS-Ti<sub>3</sub>C<sub>2</sub>T<sub>x</sub>, Ir<sub>SA</sub>-2NS-Ti<sub>3</sub>C<sub>2</sub>T<sub>x</sub>, and Ir<sub>SA</sub>-3NS-Ti<sub>3</sub>C<sub>2</sub>T<sub>x</sub>.

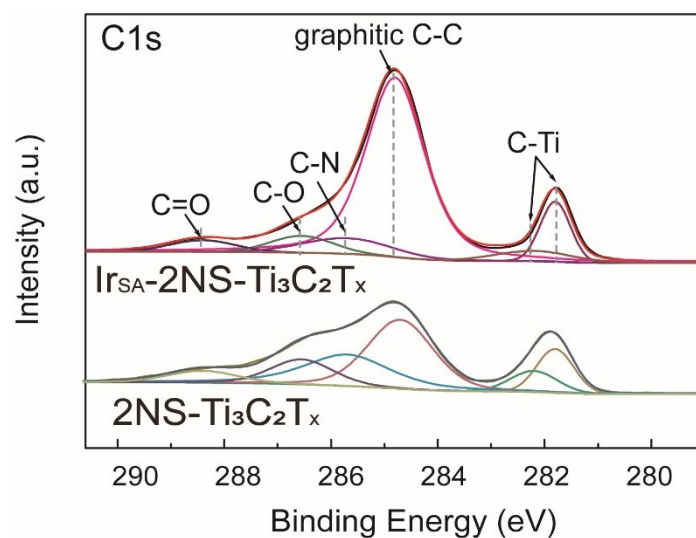

**Figure S6.** High resolution C 1s XPS spectra of the Ir<sub>SA</sub>-2NS-Ti<sub>3</sub>C<sub>2</sub>T<sub>x</sub> and 2NS-Ti<sub>3</sub>C<sub>2</sub>T<sub>x</sub> catalyst.

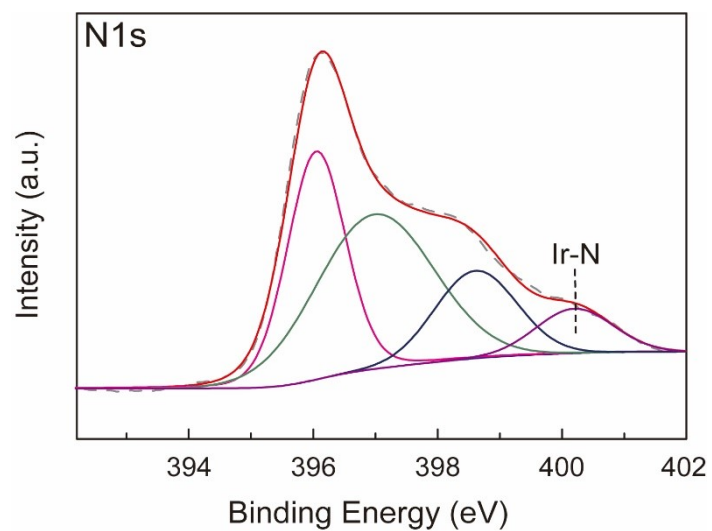

**Figure S7.** High resolution N 1s XPS spectra of the Ir<sub>SA</sub>-1NS-Ti<sub>3</sub>C<sub>2</sub>T<sub>x</sub> catalyst.

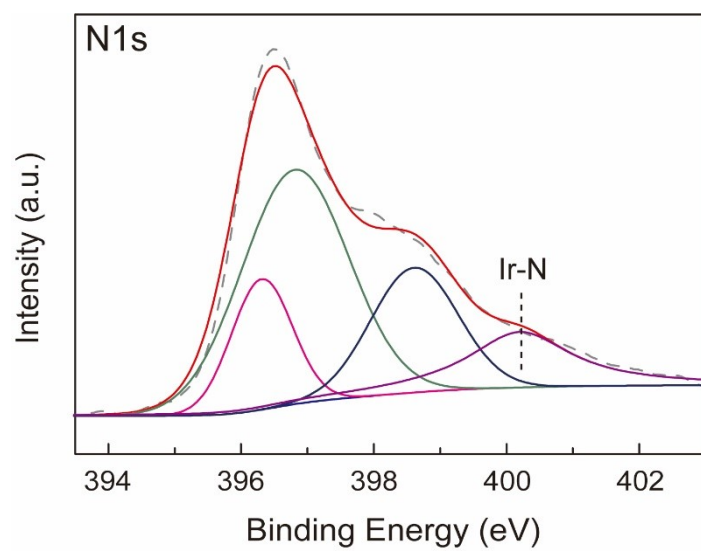

**Figure S8.** High resolution N 1s XPS spectra of the Ir<sub>SA</sub>-3NS-Ti<sub>3</sub>C<sub>2</sub>T<sub>x</sub> catalyst.

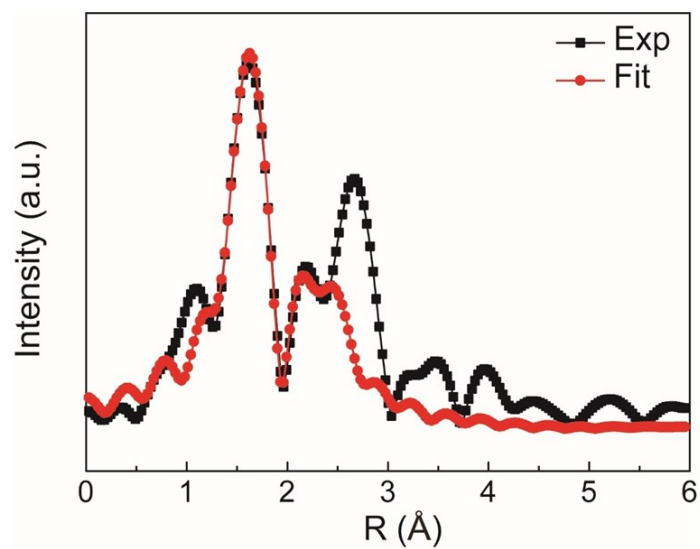

**Figure S9.** FT-EXAFS fitting curves of Ir<sub>SA</sub>-2NS-Ti<sub>3</sub>C<sub>2</sub>T<sub>x</sub> catalyst.

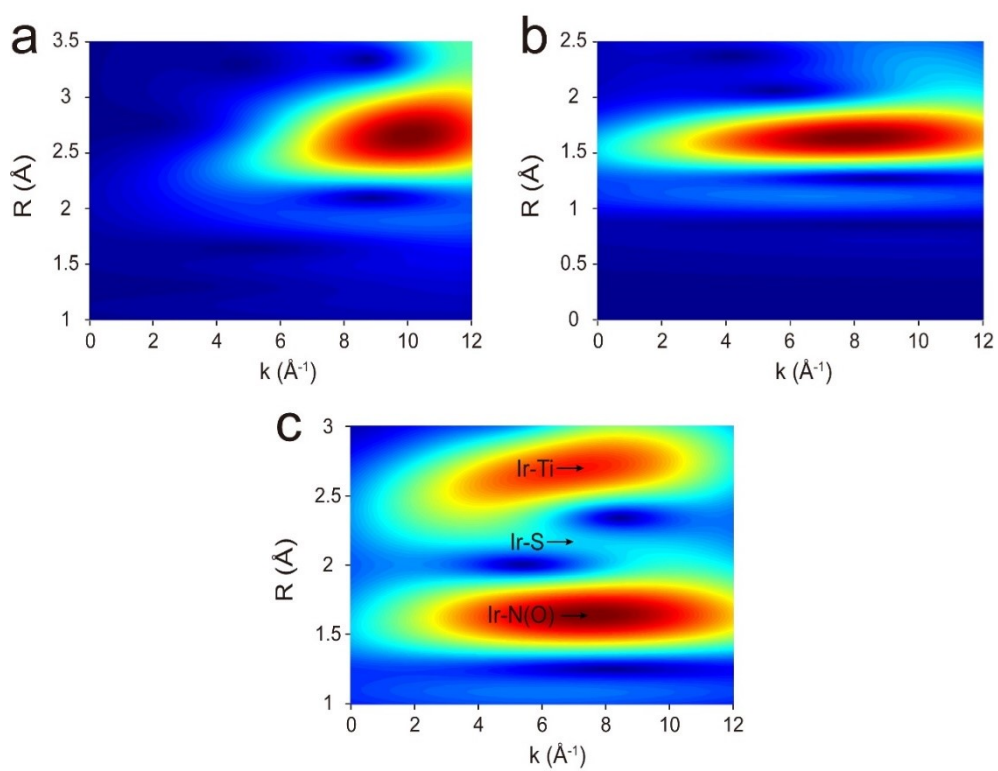

**Figure S10.** Wavelet transforms (WT) of EXAFS spectra of Ir foil, IrO<sub>2</sub> and Ir<sub>SA</sub>-2NS-Ti<sub>3</sub>C<sub>2</sub>T<sub>x</sub>.

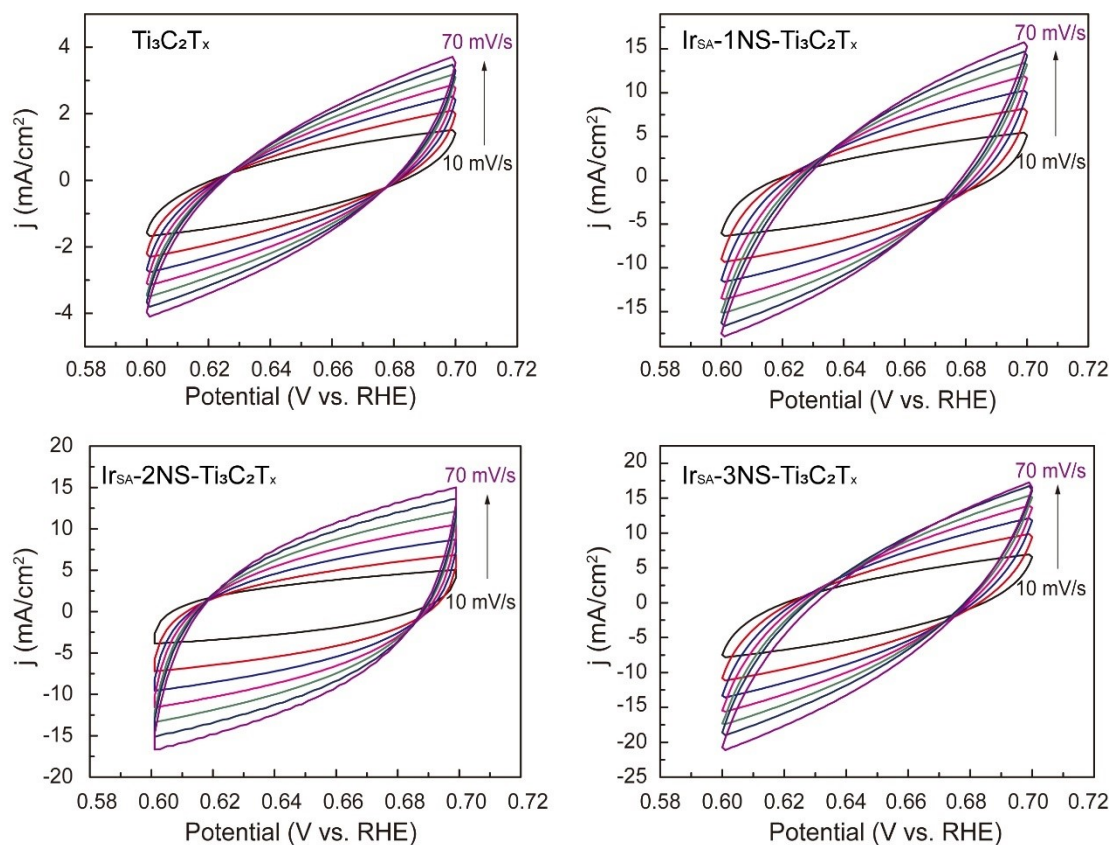

**Figure S11.** CV curves of  $\text{Ti}_3\text{C}_2\text{T}_x$ ,  $\text{Ir}_{\text{SA}}\text{-1NS-Ti}_3\text{C}_2\text{T}_x$ ,  $\text{Ir}_{\text{SA}}\text{-2NS-Ti}_3\text{C}_2\text{T}_x$ , and  $\text{Ir}_{\text{SA}}\text{-3NS-Ti}_3\text{C}_2\text{T}_x$  at different scan rates in 0.5 M  $\text{H}_2\text{SO}_4$ .

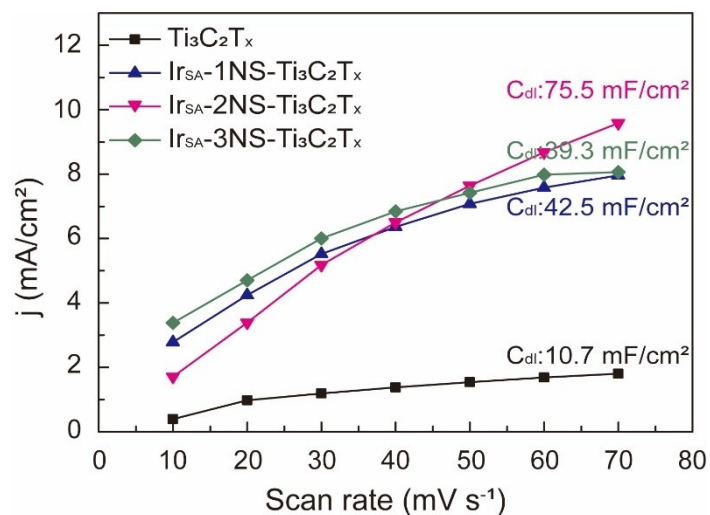

**Figure S12.** The calculated double-layer capacitance value ( $C_{\text{dl}}$ ) of  $\text{Ti}_3\text{C}_2\text{T}_x$ ,  $\text{Ir}_{\text{SA}}\text{-1NS-Ti}_3\text{C}_2\text{T}_x$ ,  $\text{Ir}_{\text{SA}}\text{-2NS-Ti}_3\text{C}_2\text{T}_x$ , and  $\text{Ir}_{\text{SA}}\text{-3NS-Ti}_3\text{C}_2\text{T}_x$ .

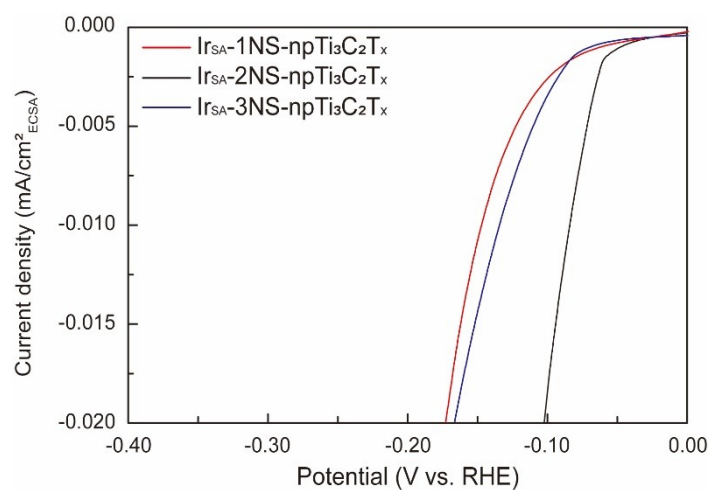

**Figure S13.** ECSA-normalized LSV curves of  $\text{Ir}_{\text{SA}}\text{-1NS-Ti}_3\text{C}_2\text{T}_x$ ,  $\text{Ir}_{\text{SA}}\text{-2NS-Ti}_3\text{C}_2\text{T}_x$ , and  $\text{Ir}_{\text{SA}}\text{-3NS-Ti}_3\text{C}_2\text{T}_x$ .

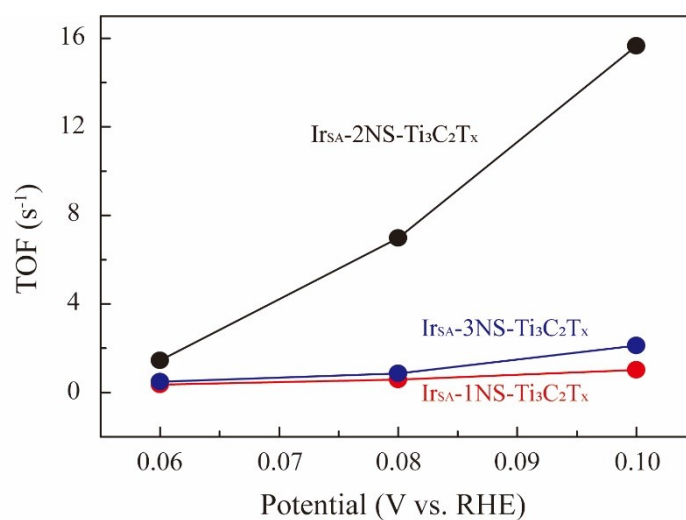

**Figure S14.** Turnover frequency (TOF) curves of  $\text{Ir}_{\text{SA}}\text{-1NS-Ti}_3\text{C}_2\text{T}_x$ ,  $\text{Ir}_{\text{SA}}\text{-2NS-Ti}_3\text{C}_2\text{T}_x$ , and  $\text{Ir}_{\text{SA}}\text{-3NS-Ti}_3\text{C}_2\text{T}_x$  samples.

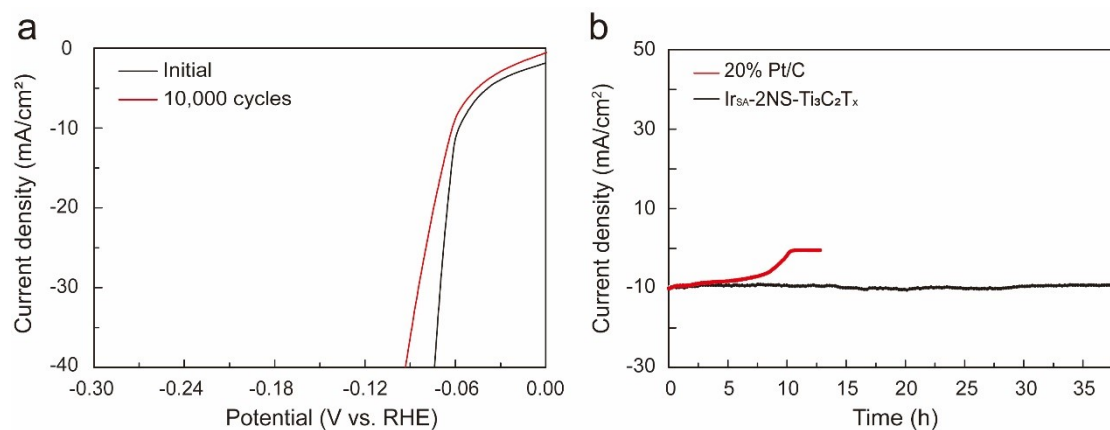

**Figure S15.** (a) LSV curves before and after 10,000 CV cycles for Ir<sub>SA</sub>-2NS-Ti<sub>3</sub>C<sub>2</sub>T<sub>x</sub> in acidic condition. (b) Durability test of Ir<sub>SA</sub>-2NS-Ti<sub>3</sub>C<sub>2</sub>T<sub>x</sub> electrocatalyst in 0.5 M H<sub>2</sub>SO<sub>4</sub>.

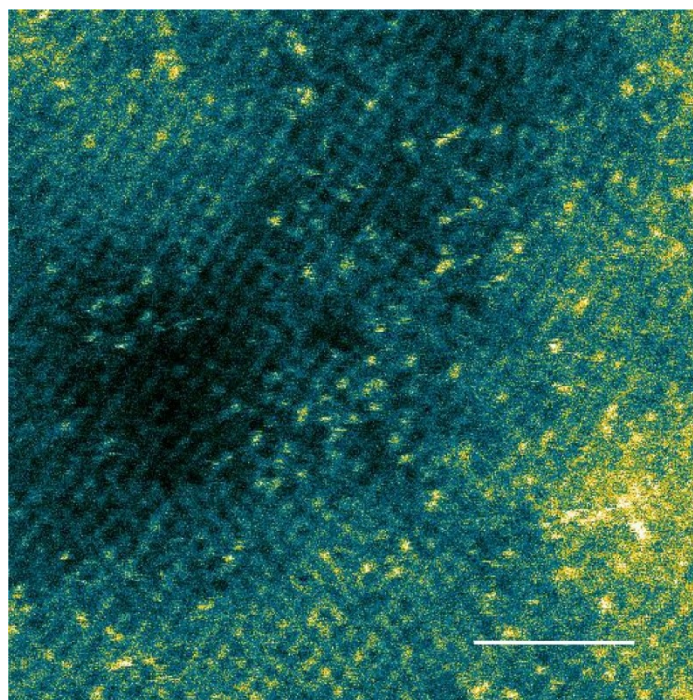

**Figure S16.** Magnified HAADF-STEM image of Ir<sub>SA</sub>-2NS-Ti<sub>3</sub>C<sub>2</sub>T<sub>x</sub>, after HER test.  
Scale bar: 2 nm.



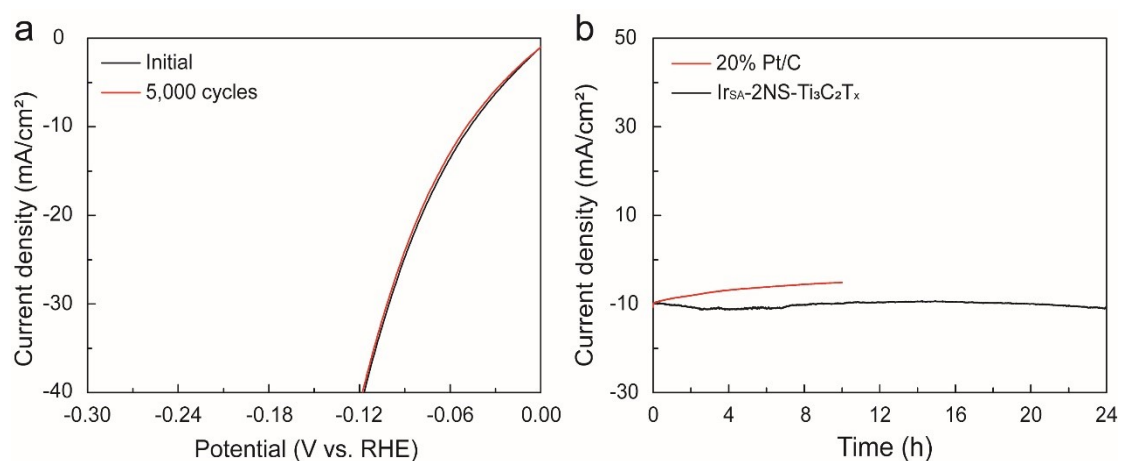

**Figure S17.** (a) LSV curves before and after 5,000 CV cycles for Ir<sub>SA</sub>-2NS-Ti<sub>3</sub>C<sub>2</sub>T<sub>x</sub> in alkaline condition. (b) Durability test of Ir<sub>SA</sub>-2NS-Ti<sub>3</sub>C<sub>2</sub>T<sub>x</sub> electrocatalyst in 1 M KOH.

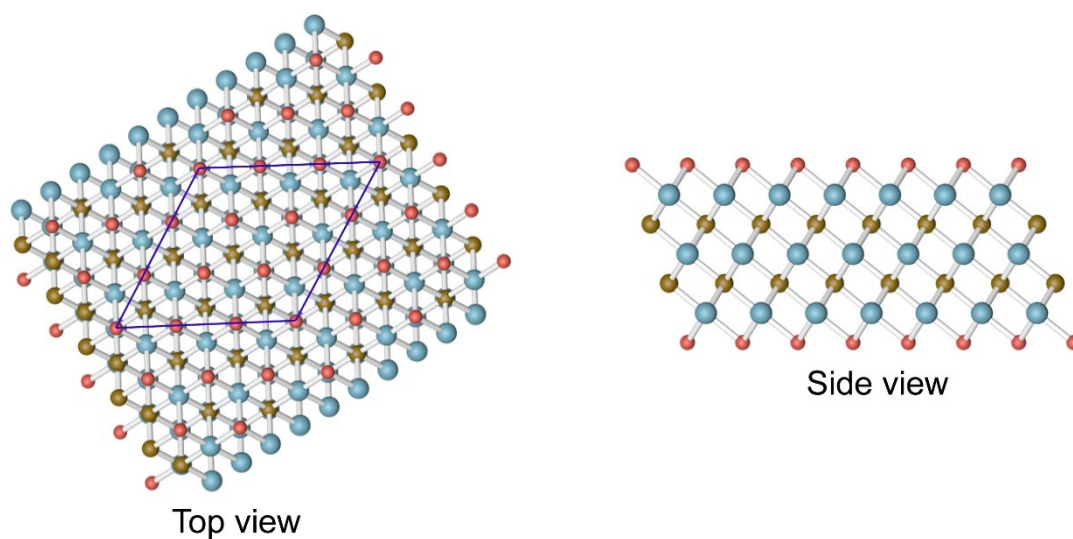

**Figure S18.** Top view and side view of the Ti<sub>3</sub>C<sub>2</sub>T<sub>x</sub> atomic model (Blue: Ti; red: O; brown: C).

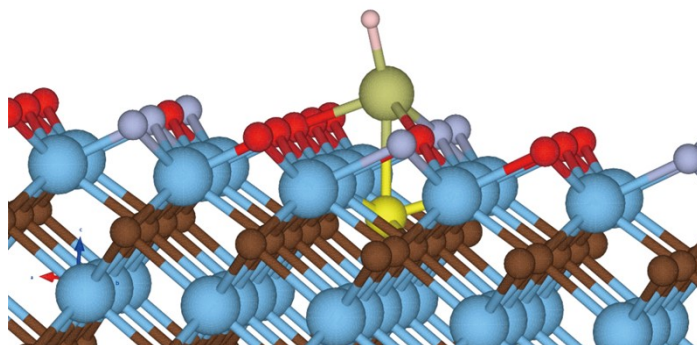

**Figure S19.** Atomic model of the Ir<sub>SA</sub>-2NS-Ti<sub>3</sub>C<sub>2</sub>T<sub>x</sub> (Blue: Ti; red: O; brown: C; yellow: S; light purple: N; light olive green: Ir; pink: H).



**Table S1.** The S atomic ratio data of Ir<sub>SA</sub>-1NS-Ti<sub>3</sub>C<sub>2</sub>T<sub>x</sub>, Ir<sub>SA</sub>-2NS-Ti<sub>3</sub>C<sub>2</sub>T<sub>x</sub> and Ir<sub>SA</sub>-3NS-Ti<sub>3</sub>C<sub>2</sub>T<sub>x</sub> from XPS result.

|          | Ir <sub>SA</sub> -1NS-Ti <sub>3</sub> C <sub>2</sub> T <sub>x</sub> | Ir <sub>SA</sub> -2NS-Ti <sub>3</sub> C <sub>2</sub> T <sub>x</sub> | Ir <sub>SA</sub> -3NS-Ti <sub>3</sub> C <sub>2</sub> T <sub>x</sub> |
|----------|---------------------------------------------------------------------|---------------------------------------------------------------------|---------------------------------------------------------------------|
| Atomic % | 0.46                                                                | 0.49                                                                | 0.47                                                                |

**Table S2.** The Ir-N content of Ir<sub>SA</sub>-NS-Ti<sub>3</sub>C<sub>2</sub>T<sub>x</sub> calculated from XPS result.

Ir<sub>SA</sub>-1NS-Ti<sub>3</sub>C<sub>2</sub>T<sub>x</sub>

| Peak        | Position (eV) | Area     |
|-------------|---------------|----------|
| Ti-N        | 396.050       | 6000.000 |
| pyridinic-N | 396.990       | 7740.593 |
| N-Ti-O      | 398.610       | 3051.462 |
| Ir-N        | 400.200       | 1450.466 |

Ir<sub>SA</sub>-2NS-Ti<sub>3</sub>C<sub>2</sub>T<sub>x</sub>

| Peak        | Position (eV) | Area     |
|-------------|---------------|----------|
| Ti-N        | 396.100       | 4751.382 |
| pyridinic-N | 397.500       | 6986.950 |
| N-Ti-O      | 398.610       | 1622.417 |
| Ir-N        | 400.200       | 1493.673 |

Ir<sub>SA</sub>-3NS-Ti<sub>3</sub>C<sub>2</sub>T<sub>x</sub>

| Peak        | Position (eV) | Area     |
|-------------|---------------|----------|
| Ti-N        | 396.310       | 2901.936 |
| pyridinic-N | 396.810       | 9163.916 |
| N-Ti-O      | 398.610       | 3979.977 |
| Ir-N        | 400.200       | 3152.189 |

**Table S3.** Structural parameters extracted from the Ir L3-edge EXAFS fitting of Ir<sub>SA</sub>-2NS-Ti<sub>3</sub>C<sub>2</sub>T<sub>x</sub>

| <i>Catalysts</i>                                                    | <i>Scattering pair</i> | <i>CN</i> | <i>R</i> (Å) | $\sigma^2$ (10 <sup>-3</sup> Å <sup>2</sup> ) | $\Delta E_0$ (eV) | <i>R-factor</i> |
|---------------------------------------------------------------------|------------------------|-----------|--------------|-----------------------------------------------|-------------------|-----------------|
| Ir <sub>SA</sub> -2NS-Ti <sub>3</sub> C <sub>2</sub> T <sub>x</sub> | Ir-N(O)                | 2.8       | 2.01         | 3.25                                          | 5.87              | 0.01            |
|                                                                     | Ir-S                   | 1.2       | 2.65         | 5.02                                          | 4.96              | 0.01            |

Note: *CN* represents the coordination number; *R* represents the interatomic distance;  $\sigma^2$  represents the Debye-Waller factor;  $\Delta E_0$  represents the edge-energy shift.

**Table S4.** Catalytic performances in acid media of electrocatalysts prepared in this work compared with previously reported MXene-based catalysts in other literatures.

| Catalyst                                                            | $\eta$ @ 10 mA/cm <sup>2</sup> (mV) | Tafel slope (mV/dec) | Reference |
|---------------------------------------------------------------------|-------------------------------------|----------------------|-----------|
| Ir <sub>SA</sub> -2NS-Ti <sub>3</sub> C <sub>2</sub> T <sub>x</sub> | 58                                  | 25.1                 | This work |
| Ir <sub>SA</sub> -NS-Ti <sub>3</sub> C <sub>2</sub> T <sub>x</sub>  | 109                                 | 73.8                 | This work |
| Ir <sub>SA</sub> -3NS-Ti <sub>3</sub> C <sub>2</sub> T <sub>x</sub> | 87                                  | 50.5                 | This work |
| Pt <sub>3.21</sub> Ni@Ti <sub>3</sub> C <sub>2</sub>                | 18.55                               | 13.3                 | [1]       |
| Pt/Ti <sub>3</sub> C <sub>2</sub> -550                              | 32.7                                | 32.3                 | [2]       |
| Ru@B-Ti <sub>3</sub> C <sub>2</sub> T <sub>x</sub>                  | 62.9                                | 100                  | [3]       |
| Ru <sub>SA</sub> -N-S-Ti <sub>3</sub> C <sub>2</sub> T <sub>x</sub> | 76                                  | 90                   | [4]       |
| Mo <sub>2</sub> TiC <sub>2</sub> T <sub>x</sub> -Pt <sub>SA</sub>   | 30                                  | 30                   | [5]       |
| MoS <sub>2</sub> /Ti <sub>3</sub> C <sub>2</sub> @C                 | 135                                 | 45                   | [6]       |
| Mo <sub>2</sub> C/Ti <sub>3</sub> C <sub>2</sub> T <sub>x</sub> @NC | 53                                  | 40                   | [7]       |
| Mo <sub>2</sub> CT <sub>x</sub> MXene                               | 189                                 | 70                   | [8]       |
| MoS <sub>2</sub> /Ti <sub>3</sub> C <sub>2</sub> T <sub>x</sub>     | 152                                 | 70                   | [9]       |
| N-Ti <sub>2</sub> CT <sub>x</sub>                                   | 215                                 | 67                   | [10]      |

|                                                           |     |      |      |
|-----------------------------------------------------------|-----|------|------|
| $\text{Ru}_{\text{SA}}\text{-N-Ti}_3\text{C}_2\text{T}_x$ | 23  | 35   | [11] |
| $\text{D-Mo}_2\text{TiC}_2/\text{Ni}$                     | 78  | 56.7 | [12] |
| S-M-5Pt                                                   | 62  | 78   | [13] |
| $\text{TiOF}_2@\text{Ti}_3\text{C}_2\text{T}_x$           | 103 | 56.2 | [14] |

**Table S5.** Catalytic performances in acid media of electrocatalysts prepared in this compared work with previously reported catalysts in other literatures.

| Catalyst                                                    | $\eta$ @ 10<br>$\text{mA}/\text{cm}^2$<br>(mV) | Tafel<br>slope<br>(mV/dec) | Reference |
|-------------------------------------------------------------|------------------------------------------------|----------------------------|-----------|
| $\text{Ir}_{\text{SA}}\text{-2NS-Ti}_3\text{C}_2\text{T}_x$ | 58                                             | 25.1                       | This work |
| $\text{Pt-MoS}_2$ (0.1M<br>$\text{H}_2\text{SO}_4$ )        | 60                                             | 96                         | [15]      |
| $\text{Mo}_2\text{C}@\text{NG}/\text{CNT}$                  | 160                                            | 65                         | [16]      |
| $\text{Ru}/\text{g-C}_3\text{N}_4\text{-C-TiO}_2$           | 112                                            | 83                         | [17]      |
| $\text{MoS}_2@\text{Mo-S-C}_3\text{N}_4$                    | 193                                            | 65                         | [18]      |
| $\text{Pt}@\text{PCM}$                                      | 105                                            | 65.3                       | [19]      |
| a-RuTe <sub>2</sub> PNRs                                    | 33                                             | 35                         | [20]      |
| $\text{Pt-SAs}/\text{WS}_2$                                 | 32                                             | 28                         | [21]      |
| $\text{Pt}_1/\text{OLC}$                                    | 38                                             | 36                         | [22]      |
| $\text{Pt SA}/\text{mWO}_3\text{-x}$                        | 47                                             | 45                         | [23]      |
| Pt-Ru dimer                                                 | 50                                             | 28.9                       | [24]      |
| Pd NPs-Bis 24h                                              | 59.6                                           | 30                         | [25]      |
| $\text{IrNiTa}/\text{Si}$                                   | 99                                             | 35                         | [26]      |
| $\text{IrCo}@\text{NC-850}$                                 | 50                                             | 25                         | [27]      |

**Table S6.** Catalytic performances in alkaline electrolyte of prepared electrocatalysts compared with previously reported catalysts in other literatures.

| Catalyst                                                                                                 | $\eta$ @ 10<br>mA/cm <sup>2</sup><br>(mV) | Tafel<br>slope<br>(mV/dec) | Reference |
|----------------------------------------------------------------------------------------------------------|-------------------------------------------|----------------------------|-----------|
| Ir <sub>SA</sub> -2NS-Ti <sub>3</sub> C <sub>2</sub> T <sub>x</sub>                                      | 40.8                                      | 50.5                       | This work |
| Ir-N-Ti <sub>3</sub> C <sub>2</sub> T <sub>x</sub>                                                       | 274.6                                     | 235.1                      |           |
| Pt <sub>3.21</sub> Ni@Ti <sub>3</sub> C <sub>2</sub><br>(0.1M KOH)                                       | 55@5                                      | 37                         | [1]       |
| Ni <sub>0.9</sub> Co <sub>0.1</sub> @NTM                                                                 | 43.4                                      | 116                        | [28]      |
| Ni@NTM                                                                                                   | 177.4                                     | 185                        |           |
| Ni <sub>0.7</sub> Fe <sub>0.3</sub> PS <sub>3</sub> @Ti <sub>3</sub> C <sub>2</sub> T <sub>x</sub> MXene | 196                                       | N.A.                       | [29]      |
| Ti <sub>3</sub> C <sub>2</sub> @mNiCoP                                                                   | 127                                       | 103                        | [30]      |
| Ti <sub>3</sub> C <sub>2</sub> @NiCO <sub>4</sub>                                                        | 248                                       | 161                        |           |
| NiS <sub>2</sub> /V-MXene                                                                                | 179                                       | 85                         | [31]      |
| NiS <sub>2</sub> /Ti-MXene                                                                               | 210                                       | 100                        |           |
| CoP@Ti <sub>3</sub> C <sub>2</sub> -MXene                                                                | 243                                       | 66                         | [32]      |
| BP QDs/Ti <sub>3</sub> C <sub>2</sub> T <sub>x</sub><br>MXene                                            | 190                                       | 83                         | [33]      |
| VOOH/Ti <sub>3</sub> C <sub>2</sub> T <sub>x</sub><br>MXene                                              | 100                                       | 81.8                       | [34]      |

## Reference

- [1] Y. Jiang, X. Wu, Y. Yan, S. Luo, X. Li, J. Huang, H. Zhang, D. Yang, *Small* 2019, **15**, 1805474.
- [2] Z. Li, Z. Qi, S. Wang, T. Ma, L. Zhou, Z. Wu, X. Luan, F.Y. Lin, M. Chen, J.T. Miller, H. Xin, W. Huang, Y. Wu, *Nano Lett.* 2019, **19**, 5102-5108.
- [3] M. Bat-Erdene, M. Batmunkh, B. Sainbileg, M. Hayashi, A.S.R. Bati, J. Qin, H. Zhao, Y.L. Zhong, J.G. Shapter, *Small* 2021, **17**, 2102218.
- [4] V. Ramalingam, P. Varadhan, H.C. Fu, H. Kim, D. Zhang, S. Chen, L. Song, D. Ma, Y. Wang, H.N. Alshareef, J.H. He, *Adv. Mater.* 2019, **31**, 1903841.
- [5] J. Zhang, Y. Zhao, X. Guo, C. Chen, C.-L. Dong, R.-S. Liu, C.-P. Han, Y. Li, Y. Gogotsi, G. Wang, *Nat. Catal.* 2018, **1**, 985-992.
- [6] X. Wu, Z. Wang, M. Yu, L. Xiu, J. Qiu, *Adv. Mater.* 2017, **29**, 1607017.
- [7] H. Wang, Y. Lin, S. Liu, J. Li, L. Bu, J. Chen, X. Xiao, J.-H. Choi, L. Gao, J.-M. Lee, *J. Mater. Chem. A* 2020, **8**, 7109-7116.
- [8] Z.W. Seh, K.D. Fredrickson, B. Anasori, J. Kibsgaard, A.L. Strickler, M.R. Lukatskaya, Y. Gogotsi, T.F. Jaramillo, A. Vojvodic, *ACS Energy Lett.* 2016, **1**, 589-594.
- [9] J. Liu, Y. Liu, D. Xu, Y. Zhu, W. Peng, Y. Li, F. Zhang, X. Fan, *Appl. Catal. B Environ.* 2019, **241**, 89-94.
- [10] Y. Yoon, A.P. Tiwari, M. Lee, M. Choi, W. Song, J. Im, T. Zyung, H.-K. Jung, S.S. Lee, S. Jeon, K.-S. An, *J. Mater. Chem. A* 2018, **6**, 20869-20877.
- [11] H. Liu, Z. Hu, Q. Liu, P. Sun, Y. Wang, S. Chou, Z. Hu, Z. Zhang, *J. Mater.*

*Chem. A* 2020, **8**, 24710-24717.

[12] Y. Zhu, G. Xu, W. Song, Y. Zhao, Z. He, Z. Miao, *Ceram. Int.* 2021, **47**, 30005-30011.

[13] C. Cui, R. Cheng, H. Zhang, C. Zhang, Y. Ma, C. Shi, B. Fan, H. Wang, X. Wang, *Adv. Funct. Mater.* 2020, **30**, 2000693.

[14] Z. Wang, K. Yu, Y. Feng, R. Qi, J. Ren, Z. Zhu, *Appl. Surf. Sci.* 2019, **496**, 143729.

[15] J. Deng, H. Li, J. Xiao, Y. Tu, D. Deng, H. Yang, H. Tian, J. Li, P. Ren, X. Bao, *Energy Environ. Sci.* 2015, **8**, 1594-1601.

[16] C. Yang, K. Shen, R. Zhao, H. Xiang, J. Wu, W. Zhong, Q. Zhang, X. Li, N. Yang, *Adv. Funct. Mater.* 2021, **32**, 2108167.

[17] Z. Li, Y. Yang, S. Wang, L. Gu, S. Shao, *ACS Appl. Mater. Interfaces* 2021, **13**, 46608-46619.

[18] B. Zhang, J. Li, Q. Song, X. Xu, W. Hou, H. Liu, *Inorg. Chem.* 2021, **60**, 2604-2613.

[19] P.A. Huabin Zhang, Wei Zhou, Bu Yuan Guan, Peng Zhang, Juncai Dong, Xiong Wen (David) Lou, *Sci. Adv.* 2018, **4**, eaao6657.

[20] J. Wang, L. Han, B. Huang, Q. Shao, H.L. Xin, X. Huang, *Nat. Commun.* 2019, **10**, 5692.

[21] Y. Shi, Z.R. Ma, Y.Y. Xiao, Y.C. Yin, W.M. Huang, Z.C. Huang, Y.Z. Zheng, F.Y. Mu, R. Huang, G.Y. Shi, Y.Y. Sun, X.H. Xia, W. Chen, *Nat. Commun.* 2021, **12**, 3021.

- [22] D. Liu, X. Li, S. Chen, H. Yan, C. Wang, C. Wu, Y.A. Haleem, S. Duan, J. Lu, B. Ge, P.M. Ajayan, Y. Luo, J. Jiang, L. Song, *Nat. Energy* 2019, **4**, 512-518.
- [23] J. Park, S. Lee, H.E. Kim, A. Cho, S. Kim, Y. Ye, J.W. Han, H. Lee, J.H. Jang, J. Lee, *Angew. Chem. Int. Ed.* 2019, **58**, 16038.
- [24] L. Zhang, R. Si, H. Liu, N. Chen, Q. Wang, K. Adair, Z. Wang, J. Chen, Z. Song, J. Li, M.N. Banis, R. Li, T.K. Sham, M. Gu, L.M. Liu, G.A. Botton, X. Sun, *Nat. Commun.* 2019, **10**, 4936.
- [25] H. Cheng, N. Yang, G. Liu, Y. Ge, J. Huang, Q. Yun, Y. Du, C.J. Sun, B. Chen, J. Liu, H. Zhang, *Adv. Mater.* 2020, **32**, 1902964.
- [26] Z.J. Wang, M.X. Li, J.H. Yu, X.B. Ge, Y.H. Liu, W.H. Wang, *Adv. Mater.* 2020, **32**, 1906384.
- [27] Y.Q. Zhou, L. Zhang, H.L. Suo, W. Hua, S. Indris, Y. Lei, W.H. Lai, Y.X. Wang, Z. Hu, H.K. Liu, S.L. Chou, S.X. Dou, *Adv. Funct. Mater.* 2021, **31**, 2101797.
- [28] C.F. Du, X. Sun, H. Yu, Q. Liang, K.N. Dinh, Y. Zheng, Y. Luo, Z. Wang, Q. Yan, *Adv. Sci.* 2019, **6**, 1900116.
- [29] C.-F. Du, K.N. Dinh, Q. Liang, Y. Zheng, Y. Luo, J. Zhang, Q. Yan, *Adv. Energy Mater.* 2018, **8**, 1801127.
- [30] Q. Yue, J. Sun, S. Chen, Y. Zhou, H. Li, Y. Chen, R. Zhang, G. Wei, Y. Kang, *ACS Appl. Mater. Interfaces* 2020, **12**, 18570-18577.
- [31] P. Kuang, M. He, B. Zhu, J. Yu, K. Fan, M. Jaroniec, *J. Catal.* 2019, **375**, 8-20.
- [32] L. Xiu, Z. Wang, M. Yu, X. Wu, J. Qiu, *ACS Nano* 2018, **12**, 8017-8028.
- [33] X.-D. Zhu, Y. Xie, Y.-T. Liu, *J. Mater. Chem. A* 2018, **6**, 21255-21260.

[34] L. Yan, X. Chen, X. Liu, L. Chen, B. Zhang, *J. Mater. Chem. A* 2020, **8**, 23637-23644.
